1 **Can *Cynodon dactylon* be used to suppress invasive weeds? The effects of density-**  
2 **dependent on the growth and development of *Tagetes minuta* and *Gutenbergia cordifolia***

3 Issakwisa B. Ngondya<sup>1,2\*</sup>, Anna C. Treydte<sup>1,3</sup>, Patrick A. Ndakidemi<sup>1</sup> & Linus K. Munishi<sup>1</sup>

4 <sup>1</sup>*Department of Sustainable Agriculture, Biodiversity Conservation and Ecosystem Management,*  
5 *School of Life Sciences and Bio-Engineering. The Nelson Mandela African Institution of Science*  
6 *and Technology, Arusha-Tanzania*

7 <sup>2</sup>*Tanzania Wildlife Management Authority, Arusha-Tanzania*

8 <sup>3</sup>*Agroecology in the Tropics and Subtropics, Hans-Ruthenberg Institute, University of*  
9 *Hohenheim, Stuttgart, Germany*

10 \*Corresponding author: [ingondya@yahoo.com](mailto:ingondya@yahoo.com)

11 **Authors' contributions**

12 IBN, PAN and LKM designed the study and experiments; IBN performed the experiments; All  
13 authors analysed the data, wrote, read and approved the manuscript.

14 **Acknowledgements**

15 Much appreciation is expressed to all laboratory technicians of the Nelson Mandela African  
16 Institution of Science and Technology for facilitating the conduction of the experiments.

17 **Abstract**

18 Plant-Plant competitive interactions have been reported to be among the forces that shape plant  
19 community structure. We studied the effects of varying the density of *Cynodon dactylon* on the  
20 growth and development of the invasive plant species *Tagetes minuta* and *Gutenbergia*  
21 *cordifolia* in pot and field plot experiments following a completely randomized design.  
22 Increasing densities of *C. dactylon* strongly reduced *T. minuta* and *G. cordifolia* growth and  
23 development, leaf total chlorophyll and increased leaf anthocyanin of both invasive species.  
24 These detrimental effects may have contributed to poorer *T. minuta* and *G. cordifolia*  
25 performance under *C. dactylon* densities of more than 8 individuals per pot/plot compared to  
26 those in pots/plots without *C. dactylon*. This study suggests that *C. dactylon* can be successfully  
27 used to manage the two invasive plants, thus, improving forage production and biomass in  
28 affected rangelands.

29

30

31

32

33

34

35

36

37 **Keywords:** Association; Mexican marigold; Couch grass; Invasion; Rangeland; Eastern Africa

## 38 **1.0. Introduction**

39 Since the 19<sup>th</sup> century, the mechanism by which plants influence the structure and composition of  
40 their surrounding plant community has been investigated. Competition has since then received a  
41 lot of attention in ecological research [1–5] and was found to directly affect the local distribution  
42 of plants in a community [6]. Plant-Plant competition has well been demonstrated in a range of  
43 ecosystems; most vividly in ecosystems where native plants have been exposed to several  
44 stresses, for instance water shortage, soil nutrient deprivation and ecological invasion [7]. The  
45 most competitive plant always dominates the ecosystem and hence, poses a risk for local  
46 extinction of some associated flora and fauna.

47 The high competition ability for nutrients, water and light of some native grass species such as  
48 *Cynodon dactylon* is likely to contribute to their competitiveness [8]. *Cynodon dactylon* has been  
49 reported to successfully escape from stresses like invasion and drought by creeping away from  
50 invaded areas through stolones and by developing a deep root system [9,10]. It can grow on soils  
51 with a wide range of pH, survive flooding [11] and can grow over twice as large in mixed  
52 cultures than in monoculture [12]. The plant has further been reported to be highly competitive  
53 over most crops [13], which highlights its importance as a potential fodder grass for management  
54 of invasive weeds.

55 *Tagetes minuta* is an unpalatable exotic invasive plant native to Mexico [14] and it has escaped  
56 cultivation in most nations and is considered a noxious weed in parts of southern Africa [15].  
57 This species has been introduced into various areas to the extent that it became a weed in most  
58 rangelands and farmlands of Tanzania [16]. Recently, the species has been reported as among  
59 problematic weeds that have invaded the Ngorongoro Conservation Area [17]. *Gutenbergia*

60 *cordifolia* on the other hand is an annual plant native to Africa. Its leaves and flowers are  
61 allergenic and toxic to animals as they contain a chemical sesquiterpene lactone [18,19] that  
62 alters the microbial composition of the rumen and thereby affects its overall metabolic  
63 functioning [20]. While in Kenya the plant has already been reported as an invasive weed in  
64 most farmlands [21,22] in Tanzania the species seems to have invaded and dominated more than  
65 half of the World Heritage site Ngorongoro crater floor (250 km<sup>2</sup>) [23] and most parts of the  
66 Serengeti ecosystem (Pers. obs).

67 Management of invasive weeds in protected ecosystems poses great challenges as herbicides,  
68 which have proven successful in farmlands, are not recommended. Herbicides often have strong  
69 negative effects on other native flora and fauna should they be chosen for management purposes  
70 [24,25]. Although alternative management options such as uprooting and mowing are often opted  
71 for, they are labor-demanding and only a short term remedy as many invasive plant seeds remain  
72 in the soil seed bank. Therefore, we claim that if utilized well, plant density dependent  
73 competitive interactions might present an opportunity for developing management strategies for  
74 some problematic weeds such as *Tagetes minuta* and *Gutenbergia cordifolia*, thereby helping in  
75 the restoration of previously invaded ecosystems particularly grazing areas. As a low-cost, low  
76 impact management technique, plant-plant competition has been reported to be effective in  
77 restoration projects [26].

78 We aimed at utilizing *C. dactylon* as a competitor due to its agronomic value as a forage species  
79 [27]. Also this species was found in previous studies to be highly competitive [8] due to, among  
80 other reasons, its ability to form deep roots [9,10] and as it can grow on soils with a wide range  
81 of pH [11]. We studied the density dependent competitive effect of *C. dactylon* on growth

82 parameters and leaf pigments of *T. minuta* and *G. cordifolia*. We set up screen house and field  
83 plot experiments by varying *C. dactylon* densities and hypothesized that this species will  
84 suppress the two weeds and, therefore, reduce their growth and development through suppression  
85 of the studied parameters. This study will pave a way for the application of *C. dactylon* as a  
86 management strategy in controlling of *T. minuta* and *G. cordifolia* invaded areas in rangelands  
87 for improved pasture production.

## 88 **2.0. Materials and Methods**

### 89 **2.1. Experimental design**

90 *Tagetes minuta* and *G. cordifolia* seeds were sown separately in pots (screen house) and in plots  
91 (field), in combination with *C. dactylon* following a simple additive design [28] in early 2016.  
92 Clay-loam soil was used in both experiments, which is similar to the Ngorongoro Crater's soil  
93 where invasion has occurred. The two invasive species were referred to as “Weed species (*W*)”  
94 i.e. *Wt* and *Wg* for *T. minuta* and *G. cordifolia*, respectively while *C. dactylon* was referred to as  
95 “species (*Cd*)”. Weed species were grown in combination with *Cd* in pots of 0.15 m height x  
96 0.56 m diameter and plots of 0.50 m x 0.50 m (Fig 1).

97 **Fig 1.** Pots (a) and plots (b) used in both screen house and field experiments respectively

98 Based on the used pots/plots size, density proportions of sown weed versus species *Cd* (*W*: *Cd*)  
99 were as follows: 2:0, 2:4, 2:6, 2:8 and 2:10, whereby 2:0 was used as control and each treatment  
100 was replicated three times (Fig 2). A total of 30 pots (five densities, three replications and two  
101 species) and 30 plots (five densities, three replications and two species) were used in this study.  
102 The interaction between *Wt*, *Wg* and *Cd* under uniform conditions (space, moisture and nutrients)

103 was studied using a completely randomized design. Seeds of both *Cd* and *W* were sown at a  
104 spacing of  $\geq 2$  cm apart. During the first two weeks, 100% of planted seeds germinated, during  
105 this period pots / plots were irrigated with water ad-libitum to ensure establishment. After  
106 successful establishment plants in all pots / plots were irrigated with 0.5 liters of water daily,  
107 watering ceased at anthesis which marks the end of vegetative growth (meristematic and  
108 elongation) phase of both weeds (9 weeks).

109 **Fig 2.** Experimental pot/ plots layout

## 110 **2.2. Parameters measured**

111 Number of vegetative branches, leaves, panicles, and seedling height and shoot diameter were  
112 measured parameters at the end of the plant's vegetative growth phase. In this study, the number  
113 of weeds per pot/plot was considered as the entire population, 100% of which was sampled (two  
114 plants per pot/plot). The number of vegetative branches leaves and panicles were counted for  
115 each plant. Plant height was measured using a meter ruler while shoot diameter was measured  
116 using vernier calipers at a height of 5 cm from the ground. The total number of leaves in all pots  
117 / plots under the same treatment was considered as a population; over 30% of leaves were  
118 randomly sampled for leaf area determination. Leaf areas were determined using java based  
119 image processing software Image J (<https://imagej.nih.gov/ij/>) [29]. *Tagetes minuta* and *G.*  
120 *cordifolia* root lengths were measured using a meter ruler. Young leaves from the top-most part  
121 of the plant were sampled randomly per pot for chlorophyll determination while mature leaves  
122 were randomly sampled for anthocyanin level determination.

123 During the 9<sup>th</sup> week, (the end of vegetative growth phase) both *T. minuta* and *G. cordifolia* were  
124 harvested (uprooted), washed, placed into paper bags and dried at 80°C for 48 hours [30]. Shoot  
125 and root material was separated and weighed to obtain total above / below ground dry biomass  
126 [30].

### 127 **2.3. Measurement of leaf pigments**

128 Leaf chlorophyll content has been linked to plant health status [31] and, therefore, a crucial  
129 parameter to be assessed during plant growth and development. Leaf chlorophyll of *T. minuta*  
130 and *G. cordifolia* plants was extracted according to [32] with some modifications: 50 mg of fresh  
131 leaves of 2.25 cm<sup>2</sup> were immersed in 4 ml of Dimethyl Sulfoxide (DMSO) and incubated at  
132 65°C for 12 h. The extract was transferred to glass cuvettes for absorbance determination. The  
133 absorbance of blank liquid (DMSO) and samples were determined under 2000 UV/VIS  
134 spectrophotometer (UNICO®) at 663 nm and 645 nm [32] and the total leaf chlorophyll (total  
135 Chl) calculated according to [33] using the following equation:

$$136 \text{ Total Chl} = 0.0202A_{663} + 0.00802A_{645}$$

137 Where  $A_{663}$  and  $A_{645}$  are absorbance readings at 663 nm and 645 nm respectively

138 Bioassay of levels of anthocyanins in leaves of *T. minuta* and *G. cordifolia* were performed as  
139 described by [34]. Leaves of *T. minuta* and *G. cordifolia* were oven-dried at 60°C for 48 h,  
140 weighed, ground into a fine powder. Then, 0.10 g of leaf powder was weighed and mixed with  
141 10 ml of acidified methanol prepared from a ratio of 79:20:1 MeOH:H<sub>2</sub>O:HCl. The mixture was  
142 incubated for 72 h in darkness for auto-extraction and filtered through Whatman paper Number  
143 2. The extract was transferred to glass cuvettes for absorbance determination. The absorbance of

144 acidified methanol as standard and that of samples were determined under a 2000 UV/VIS  
145 spectrophotometer (UNICO®) at 530 nm and 657 nm and expressed as Abs g.DM-1 [34].  
146 Anthocyanin concentration in leaf extracts was measured as  $A_{530} - 1/3A_{657}$  [34] where  $A_{530}$  and  
147  $A_{657}$  are absorbance readings at 530 nm and 657nm, respectively.

#### 148 **2.4. Data analysis**

149 Shapiro-Wilk test for normality was performed on the number of vegetative branches, leaves,  
150 panicles, Plant height, shoot diameter, root length, leaf area, leaf total chlorophyll content, leaf  
151 anthocyanin concentration, shoot and root biomass of *T. minuta* and *G. cordifolia*. For all data  
152 that passed normality test, one-way analysis of variance (ANOVA) was carried out whilst  
153 for non-normally distributed data a Kruskal–Wallis test was performed. For both invasive  
154 weed species, one-way ANOVA was performed on the number of vegetative branches, number  
155 of panicles, leaf area, shoot diameter, leaf total chlorophyll and leaf anthocyanins concentration  
156 versus varying density of *C. dactylon*. Kruskal-Wallis test was carried out on the number of  
157 leaves, plant height, root biomass, shoot biomass and root length per plant. Pearson's Product  
158 Moment and Spearman correlations were also performed on normally and non-normally  
159 distributed data respectively. The resulting means were separated by the Fisher's Least  
160 Significant Difference (LSD). The statistical software used was STATISTICA version 8 and the  
161 level of significance was set at  $p < 0.05$ .



162 **3.0. Results**

163 **3.1. *Cynodon dactylon* density dependent competitive effects on *T. minuta* and *G. Cordifolia***

164 **3.1.1. General observation**

165 General decrease in *Gutenbergia cordifolia* and *Tagetes minuta* vigor was observed along  
166 increasing density gradient of *Cynodon dactylon* (Figs 3 and 4).

167 **Fig 3.** Effects of increasing densities of *Cynodon dactylon* on *T. minuta* vigor (C=*Cynodon*  
168 *dactylon* and T=*Tagetes minuta*, numbers represent proportions of sown *Cynodon dactylon* and  
169 *Tagetes minuta* where by C<sub>0</sub>T<sub>2</sub> was a control)

170 **Fig 4.** Effects of increasing densities of *Cynodon dactylon* on *G. cordifolia* vigor (C=  
171 *Cynodon dactylon* and G=*Gutenbergia cordifolia*, numbers represent proportions of sown  
172 *Cynodon dactylon* and *Tagetes minuta* where by C<sub>0</sub>G<sub>2</sub> was a control)

173 **3.1.2. Plant growth parameters**

174 The mean number of vegetative branches, panicles and leaf area of both *T. minuta* and *G.*  
175 *cordifolia* species differed significantly across the five *C. dactylon* treatments (Tables 1 and 2)  
176 and was over four times higher in control pots/plots than in pots/plots with *C. dactylon* when the  
177 latter's densities reached more than 8 individuals per pot or plot (Figs 5 and 6).

178

179

180 **Table 1.** Effects of increasing densities of *Cynodon dactylon* on *T. minuta* and *G. cordifolia*  
 181 growth parameters and leaf pigmentation in the screen house experiment

| Parameters                              | <i>Tagetes minuta</i> |       |      |                      | <i>Gutenbergia cordifolia</i> |      |      |                      |
|-----------------------------------------|-----------------------|-------|------|----------------------|-------------------------------|------|------|----------------------|
|                                         | MS                    | F     | H    | p                    | MS                            | F    | H    | p                    |
| Veg. branches per/plant                 | -                     | -     | 10.0 | 0.03                 | 46                            | 4.4  | -    | 0.02                 |
| Plant height (cm)                       | 1732                  | 32.2  | -    | <0.01                | 452                           | 1.9  | -    | 0.18                 |
| Leaf area (mm <sup>2</sup> )            | -                     | -     | 12.2 | 0.01                 | 1213                          | 6.6  | -    | 0.01                 |
| No. of leaves/plant                     | 162                   | 23.9  | -    | <0.01                | 12                            | 1.3  | -    | 0.33                 |
| Shoot diameter (mm)                     | 19                    | 21.6  | -    | 0.01                 | 8                             | 8.2  | -    | <0.01                |
| Shoot biomass (g)                       | -                     | -     | 11.7 | 0.02                 | -                             | -    | 11.1 | 0.02                 |
| Root biomass (g)                        | -                     | -     | 12.2 | 0.01                 | -                             | -    | 1.3  | 0.86                 |
| Root length (cm)                        | 142                   | 5.2   | -    | 0.02                 | 44                            | 1.9  | -    | 0.17                 |
| No. of panicles/plant                   | 526                   | 68.7  | -    | 3.1x10 <sup>-7</sup> | 201                           | 37.3 | -    | 5.6x10 <sup>-6</sup> |
| Chlorophyll                             | 0.03                  | 116.6 | -    | <0.01                | -                             | -    | 13.2 | 0.01                 |
| Anthocyanins ( Abs g.DM <sup>-1</sup> ) | -                     | -     | 11.7 | 0.02                 | 0.01                          | 2.5  | -    | 0.11                 |

182 \*MS= Mean square, F= F-value, H=Kruskal-Wallis H-test, P= P-value

183

184

185

186

187

188

189 **Table 2.** Effects of increasing densities of *Cynodon dactylon* on *T. minuta* and *G. cordifolia*  
 190 growth parameters and leaf pigmentation in the field plot experiment.

| Parameters                              | <i>Tagetes minuta</i> |      |      |                      | <i>Gutenbergia cordifolia</i> |      |      |       |
|-----------------------------------------|-----------------------|------|------|----------------------|-------------------------------|------|------|-------|
|                                         | MS                    | F    | H    | P                    | MS                            | F    | H    | P     |
| Veg. branches per/plant                 | 379                   | 65.1 | -    | <0.01                | 184                           | 14.3 | -    | <0.01 |
| Plant height (cm)                       | 1414                  | 13.3 | -    | 0.01                 | 480                           | 1.7  | -    | 0.22  |
| Leaf area (mm <sup>2</sup> )            | 43487857              | 31.4 | -    | <0.01                | -                             | -    | 12.3 | 0.02  |
| No. of leaves/plant                     | 206                   | 17.4 | -    | <0.01                | 67                            | 7.9  | -    | 0.01  |
| Shoot diameter (mm)                     | 35                    | 38.7 | -    | <0.01                | 9.7                           | 32.8 | -    | <0.01 |
| Shoot biomass (g)                       | -                     | -    | 13.5 | 0.01                 | -                             | -    | 10.5 | 0.03  |
| Root biomass (g)                        | -                     | -    | 13.2 | 0.01                 | -                             | -    | 7.0  | 0.13  |
| Shoot biomass (g)                       | -                     | -    | 13.5 | 0.01                 | -                             | -    | 10.5 | 0.03  |
| Root length (cm)                        | 250                   | 13.8 | -    | <0.01                | 54.8                          | 2.8  | -    | 0.08  |
| No. of panicles/plant                   | 439                   | 41.6 | -    | 3.3x10 <sup>-6</sup> | -                             | -    | 12.8 | 0.01  |
| Chlorophyll                             | -                     | -    | 13.0 | 0.01                 | -                             | -    | 13.5 | 0.01  |
| Anthocyanins ( Abs g.DM <sup>-1</sup> ) | 0.0676                | 28.7 | -    | <0.01                | 0.024                         | 12.5 | -    | 0.01  |

191 \*MS= Mean square, F= F-value, H=Kruskal-Wallis H-test, P= P-value

192 The mean number of leaves and plant height differed significantly in *T. minuta* ( $p < 0.05$ ), being  
 193 half as many and shorter in pots/plots with  $\geq 8$  *C. dactylon* per pot/plot as those in control  
 194 treatment but no difference was observed for *G. cordifolia* ( $p > 0.05$ ) (Figs 5 and 6).

195 **Fig 5.** *Cynodon dactylon* varying density effects on the number of vegetative branches, plant  
 196 height, leaf area and number of leaves of *T. minuta* and *G. cordifolia* in a screen house  
 197 experiment. *Cynodon dactylon* densities ranged from 0 to 10 while the number of weeds per pot  
 198 was two. Bars with dissimilar letters are significant by Fisher LSD at  $p = 0.05$

199 **Fig 6.** *Cynodon dactylon* varying density effects on the number of vegetative branches, plant  
200 height, leaf area and number of leaves of *T. minuta* and *G. cordifolia* in field plot experiment.  
201 *Cynodon dactylon* densities ranged from 0 to 10 while the number of weeds per plot was two.  
202 Bars with dissimilar letters are significant by Fisher LSD at  $p = 0.05$

203 Mean shoot diameter and shoot biomass differed significantly across the five *C. dactylon*  
204 densities in both *T. minuta* and *G. cordifolia* ( $p < 0.05$ ). *Tagetes minuta* and *G. cordifolia* in  
205 pots/plots with *C. dactylon* density  $\geq 8$  per pot or plot had had half the diameter and were twice  
206 as light as *T. minuta* and *G. cordifolia* contained in control pots/plots. Mean root biomass and  
207 root length differed significantly only in *T. minuta* ( $p < 0.05$ ) but not in *G. cordifolia* ( $p > 0.05$ )  
208 (Figs 7 and 8). *Tagetes minuta* in pots/plots with *C. dactylon* density  $\geq 8$  per pot or plot had roots  
209 with over four times lighter weight and half the length of roots of *T. minuta* in control pots/plots  
210 (Tables 1 and 2).

211 **Fig 7.** *Cynodon dactylon* varying density effects on mean shoot diameter, shoot biomass, root  
212 biomass, and root length of *T. minuta* and *G. cordifolia* intercrops in a screen house experiment.  
213 *Cynodon dactylon* densities ranged from 0 to 10 while the number of weeds per pot was two.  
214 Bars with dissimilar letters are significant by Fisher LSD at  $p = 0.05$

215 **Fig 8.** *Cynodon dactylon* varying density effects on mean shoot diameter, shoot biomass, root  
216 biomass, and root length of *T. minuta* and *G. cordifolia* intercrops in field plot experiment.  
217 *Cynodon dactylon* densities ranged from 0 to 10 while the number of weeds per plot was two.  
218 Bars with dissimilar letters are significant by Fisher LSD at  $p = 0.05$

### 219 **3.1.3. Leaf pigmentations**

220 In both *T. minuta* and *G. cordifolia*, total leaf chlorophyll content differed significantly across  
221 the five *C. dactylon* treatments that were planted separately ( $p < 0.05$ ) (Fig 9; Tables 1 and 2).  
222 *Tagetes minuta* and *G. cordifolia* in control pots/plots had three times total leaf chlorophyll than  
223 *T. minuta* and *G. cordifolia* contained in pots/plots with *C. dactylon* density  $\geq 8$  per pot or plot.

224 **Fig 9.** Mean ( $\pm$ SE) total leaf chlorophyll content of *T. minuta* and *G. cordifolia* planted with  
225 various *C. dactylon* densities (a) in screen house and (b) field plot experiments. *Cynodon*  
226 *dactylon* densities ranged from 0 to 10 while the number of weeds per pot/plot was two

227 Leaf anthocyanin concentrations differed significantly across the five *C. dactylon* treatments in  
228 both *T. minuta* and *G. cordifolia* ( $p < 0.05$ ) (Fig 10; Tables 1 and 2). *Tagetes minuta* and *G.*  
229 *cordifolia* contained in pots/plots with *C. dactylon* density  $\geq 8$  per pot or plot had twice the total  
230 leaf anthocyanin than *T. minuta* and *G. cordifolia* in control pots/plots.

231 **Fig 10.** Mean ( $\pm$ SE) total leaf anthocyanins of *T. minuta* and *G. cordifolia* planted with various  
232 *C. dactylon* densities (a) in screen house and (b) field plot experiments. *Cynodon dactylon*  
233 densities ranged from 0 to 10 while the number of weeds per pot/plot was two

## 234 **4.0. Discussion**

### 235 **4.1. *Cynodon dactylon* density dependent competitive effects on *T. minuta* and *G. cordifolia*** 236 ***growth parameters***

237 The experiments showed that increasing densities of *C. dactylon* affects *T. minuta* and *G.*  
238 *cordifolia* negatively. While increasing densities of *C. dactylon* decreased plant height, shoot

239 diameter, shoot biomass, leaf area, root biomass, the number of vegetative branches, leaves and  
240 root length of *T. minuta*, only shoot diameter, shoot biomass, the number of vegetative branches  
241 and leaf area were affected in *G. cordifolia*. These growth parameters are crucial to the growth  
242 and overall fitness of a plant [pers. obs.]. Plant height, leaf area and number of leaves for  
243 instance have ensured plants to intercept up to a recommended 95% of the incoming solar  
244 radiation for photosynthesis [35,36]. While shoot diameter and biomass aid in overcoming  
245 stresses (stress tolerance) such as trampling by animals and wind destruction [37], the number of  
246 panicles per plant determines the amount of seeds deposited in the soil which is crucial for  
247 invasion success of most weeds [38]. We observed a significant reduction in the number of *T.*  
248 *minuta* & *G. cordifolia* panicles per increasing density of *C. dactylon* which signifies that *C.*  
249 *dactylon* potentially reduce *T. minuta* and *G. cordifolia* seeds to be deposited in invaded areas.  
250 Therefore, the observed evidence suggest that; reduction in of panicles is likely to reduce seed  
251 production by weeds, thus allowing for application of this technique in the management of weeds  
252 in affected areas [38,39]. The greater negative effects of *C. dactylon* on *T. minuta* versus *G.*  
253 *cordifolia* may be due to *T. minuta*'s shorter and lighter roots compared to those of *G. cordifolia*  
254 [pers. obs.]. Possibly, *G. cordifolia*'s greater root weight and length render this species less prone  
255 to suppression by competition compared to *T. minuta*. As predicted, the negative competitive  
256 effects were more pronounced with increasing densities of *C. dactylon*, a plant that has been  
257 reported as a very strong competitor to most crops [13] likely due to increased competition for  
258 available nutrients and space, in which *C. dactylon* out-competed the two invasive weeds.  
259 Competitiveness of *C. dactylon* has been associated with its stoloniferous nature and an ability to  
260 develop deep roots [9] that easily escape the effects competition. While monocultures from  
261 invasive plants have been reported to not only suppress other native species [40] but also bad for

262 soil health [41]; intercrops were shown to be mostly of facilitative nature, especially in maize-  
263 legume combinations [42,43]. In contrast, in our study particularly the *C. dactylon* density  
264 dependent competition resulting from inter-planting *C. dactylon* / *T. minuta* and or *C. dactylon* /  
265 *G. cordifolia* can potentially reduce invasiveness of the two weeds as weed' growth parameters  
266 that are crucial for plant fitness were significantly reduced.

267 **4.2. *Cynodon dactylon* density dependent competitive effects on *T. minuta* and *G. cordifolia***  
268 ***leaf pigmentations***

269 As *C. dactylon* density increased, leaf chlorophyll content dropped in both *T. minuta* and *G.*  
270 *cordifolia*. This could be due to the weed species' reduced access to water, nutrients and space.  
271 For example, as Nitrogen becomes less available to a particular plant, its chlorophyll production  
272 is reduced [44,45] and, consecutively, its leaf chlorophyll content. The results of this study imply  
273 that an increase in *C. dactylon* density has a potential of exerting enough stress to affect the two  
274 weeds' chlorophyll productivity. Leaf chlorophyll content has been linked to plant health status  
275 [31] as it is associated with energy production and, hence, important for other metabolic  
276 activities [31]. Plants with reduced chlorophyll amount and, thereby, reduced photosynthetic  
277 capacity [45] also possess flowers with accelerated abscission [46], which reduces chances of  
278 dispersal by pollinators. Reduced dispersal of the two weeds will reduce the chance for weed's  
279 monoculture formation, which has been proven to be devastating in an invaded ecosystem  
280 [40,47]. Increasing density of *C. dactylon* in *T. minuta* and or *G. cordifolia* invaded areas  
281 therefore, can potentially be used as an environmentally friendly invasive species management  
282 approach.

283 We observed an increasing anthocyanin concentration in *T. minuta* and *G. cordifolia* with  
284 increasing numbers of *C. dactylon*. Anthocyanins, which are a small group of pigments within  
285 flavonoids, form red-blue coloration in most plants [48]. The increase of anthocyanin levels in  
286 plant leaves under increasing *C. dactylon* densities in this study can be linked to the increasing  
287 level of competition, specifically for nutrients and space due to increasing density of *C. dactylon*.  
288 This is in line with [49] who argued that anthocyanin induction and / or accumulation in a plant  
289 tissue can be associated with nitrogen and / or phosphorus deficiency. *Cynodon dactylon*  
290 competitive effects as a strategy for suppressing *T. minuta* and *G. cordifolia* [50] could be  
291 another possible cause of increased anthocyanins in leaves of both *T. minuta* and *G. cordifolia*  
292 exposed to increasing density of *C. dactylon*. Generally, the presence of these pigmentations in  
293 leaves is normally associated with stressors [48]. In this study, the stressor that have possibly  
294 induced increased anthocyanins in leaves of both *T. minuta* and *G. cordifolia* can be associated  
295 with competitive effects of *C. dactylon* for the available nutrients, space and water. It is a known  
296 fact that the rate of photosynthesis is directly proportional to plant's chlorophyll content [51]  
297 intercepting solar radiation. Anthocyanin pigments reduce a plant's chlorophyll content, thereby  
298 negatively affecting photosynthesis. Therefore, we claim that treating the two weeds with  
299 increasing densities of *C. dactylon* can be used to biologically manage the two invasive weeds  
300 efficiently.

## 301 **5.0. Conclusions**

302 In this study, shorter plant height, smaller shoot diameter, smaller leaf area and lower shoot  
303 biomass of *T. minuta* and *G. cordifolia* under higher *C. dactylon* densities reduces both *T. minuta*  
304 and *G. cordifolia* fitness. Moreover, reduced leaf total chlorophyll and increased anthocyanin



305 levels in leaves affects the photosynthetic ability of both invasives *T. minuta* and *G. cordifolia*.  
306 The net effect, therefore, is the development of weaker *T. minuta* and *G. cordifolia* plants that are  
307 easily affected by other stressors such as animal trampling and, thus, can be managed  
308 accordingly. Our screen house and field experiments determined that the critical density of *C.*  
309 *dactylon* to suppress the two invasive species studies is  $\geq 8$  plants/m<sup>2</sup>. Our findings show an  
310 alternative way to suppress weeds, particularly in rangelands and protected areas.

311

312

313

314

315

316

317

318

319

320

321

322 **Acknowledgements**

323 Much appreciation is expressed to all laboratory technicians of the Nelson Mandela African  
324 Institution of Science and Technology for facilitating the conduction of the experiments.

325

326

327

328

329

330

331

332

333

334

335

336

337

338

339

340

341

342

343

344

345

346

347

348 **References**

- 349 1. Connell JH, Slatyer RO. Mechanisms of Succession in Natural Communities and Their  
350 Role in Community Stability and Organization. *Am Nat.* 1977;111(982):1119–44.
- 351 2. Connell JH. On the prevalence and relative importance of interspecific competition:  
352 evidence from field experiments. *Am Nat.* 1983;122(5):661–96.
- 353 3. Schoener T. Field Experiments on Interspecific Competition. *Am Nat.* 1983;122:240-285.
- 354 4. Keddy P. Competition. Population and Community Biology Series. In: Chapman and Hall,  
355 London, UK. Chapman and Hall, London, UK.: Chapman and Hall, London, UK.; 1989.
- 356 5. Goldberg DE, Barton AM. Patterns and Consequences of Interspecific Competition in  
357 Natural Communities : A Review of Field Experiments with Plants Patterns and  
358 Consequences of Interspecific Competition in Natural Communities : A Review of Field  
359 Experiments with Plants. *Am Nat.* 2014;(June).
- 360 6. Stoll P, Prati D. INTRASPECIFIC AGGREGATION ALTERS COMPETITIVE  
361 INTERACTIONS IN EXPERIMENTAL PLANT COMMUNITIES. *Ecology.*  
362 2001;82(2):319–27.
- 363 7. Daehler CC. Performance Comparisons of co-occurring Native and Alien Invasive Plants :  
364 Implications for Conservation and Restoration. *Annu Rev Ecol Evol Syst.* 2003;34:183–  
365 211.
- 366 8. Auclair D, Dupraz C. Agro forestry for Sustainable Land-Use Fundamental Research and

- 367 Modeling with Emphasis on Template and Mediterranean Applications. Selected Papers  
368 from a Workshop Held in Montpellier, France, 23–29 June 1997. In: Springer Science &  
369 Business Media, 9 Mar 2013 - Technology & Engineering. Springer Science & Business  
370 Media, 9 Mar 2013 - Technology & Engineering; 2013. p. 275.
- 371 9. Horowitz M. Competitive Effects of *Cynodon dactylon*, *Sorghum halepense* and *Cyperus*  
372 *rotundus* on Cotton and Mustard. *Exp Agric*. 1973;9(3):263–73.
- 373 10. Shi H, Wang Y, Cheng Z, Ye T, Chan Z. Analysis of Natural Variation in Bermudagrass (*Cynodon dactylon*) Reveals Physiological Responses Underlying Drought Tolerance. *PLoS One*. 2012;7(12):e53422.
- 376 11. Burton G, Hanna W. Bermuda grass. In M. Heath, R. Barnes, and D. Metcalfe ed. *Forages the Science of Grassland Agriculture*. Iowa State University Press, Ames, Iowa. 1985;643.
- 378 12. COHN EJ, VAN AUKEN OW, BUSH JK. University of Notre Dame Competitive  
379 Interactions between *Cynodon dactylon* and *Acacia smallii* Seedlings at Different Nutrient  
380 Levels. *Am Midl Nat*. 1989;121(2):265–72.
- 381 13. Juraimi A, Drennan D, Anuar N. Competitive Effect of *Cynodon dactylon* (L.) Pers. on  
382 Four Crop Species, Soybean [*Glycine max* (L.) Merr.], Maize (*Zea mays*), Spring Wheat  
383 (*Triticum aestivum*) and Faba Bean [*Vicia faba* (L.)]. *Asian J Plant Sci*. 2005;4:90–4.
- 384 14. Hulina N. Wild Marigold - *Tagetes minuta* L., New Weed on the Island of Hvar, and  
385 New Contribution to the Knowledge of its Distribution in Dalmatia (Croatia). *Agric*  
386 *Conspic Sci*. 2008;73(1):23–6.

- 387 15. Wells M, Balsinhas A, Joffe H, Engelbrecht M, Harding G SH. A catalogue of problem  
388 plants in Southern Africa. Mem Bot Surv South Africa. 1986;53.
- 389 16. USAID-Tanzania. A Report on Tanzania environmental threats and opportunities  
390 assessment. US Department of Agriculture Forest Service- International Programs. 2012.
- 391 17. NCAA. Invasive alien plants strategic management plan in Ngorongoro Conservation  
392 Area. 2011.
- 393 18. Zdero C, Bohlmann F, Word K. Germacranolides from *Gutenbergia*. *Phytochemistry*.  
394 1990;29(8):2706–8.
- 395 19. Bussmann RW, Gilbreath GG, Solio J, Lutura M, Lutuluo R, Kunguru K, et al. Plant use  
396 of the Maasai of Sekenani Valley, Maasai Mara, Kenya. *J Ethnobiol Ethnomed*. 2006;2:1–  
397 7.
- 398 20. Amorim MHR, Gil Da Costa RM, Lopes C, Bastos MMSM. Sesquiterpene lactones:  
399 Adverse health effects and toxicity mechanisms. *Crit Rev Toxicol*. 2013;43(7):559–79.
- 400 21. Anderson, Pamela K.; Morales FJ (eds. ). Whitefly and whitefly-borne viruses in the  
401 tropics: building a knowledge base for global action. In: (CIAT publication no 341).  
402 Centro Internacional de Agricultura Tropical (CIAT), Cali, CO.: (CIAT publication no.  
403 341); 2005. p. 351.
- 404 22. Gharabadiyan F, Jamali S, Yazdi AA. Weed hosts of root-knot nematodes in tomato  
405 fields. *J Plant Prot Res*. 2012;52(2):230-234.

- 406 23. UNESCO. Information Presented to the Bureau of the World Heritage Committee.  
407 [Internet]. World Heritage Center, Paris-France. 2001 [cited 2016 Mar 22]. Available  
408 from: <http://whc.unesco.org/en/soc/2490>
- 409 24. Hidrayani, Purnomo;Rauf A, Ridland PM, Hoffmann A. Pesticide applications on Java  
410 potato fields are ineffective in controlling leafminers , and have antagonistic effects on  
411 natural enemies of leafminers Pesticide applications on Java potato fields are ineffective in  
412 controlling leafminers , and have antag. *Int J Pest Manag.* 2005;51(3):181-187.
- 413 25. Poorter M, Pagad S UM. Invasive Alien Species and Protected Areas: A Scoping Report,  
414 Part I. The Global Invasive Species Programme (GISP). 2007.
- 415 26. Benayas JMR, Fernández A, Aubenau A. Clipping herbaceous vegetation improves early  
416 performance of planted seedlings of the Mediterranean shrub *Quercus coccifera*. *Web*  
417 *Ecol.* 2007;7:120–31.
- 418 27. Heshmati GA, Pessarakli M. Threshold Model in Studies of Ecological Recovery in  
419 Bermudagrass ( *Cynodon dactylon* L .) Under Nutrient StressConditions. *J Plant Nutr.*  
420 2011;34:2183-2192.
- 421 28. Kelty M, Cameron I. Plot Design for the Analysis of Species Interactions in Mixed  
422 Stands. In: *Common Wealth Forestry Review* 744. 1995. p. 322-332.
- 423 29. Schneider C, Rasband W EK. NIH Image to ImageJ: 25 years of image analysis. *Nat*  
424 *Methods.* 2012;9(7):671-675.
- 425 30. SERAS. Standard Operating Procedures No. 2034: Plant biomass determination. U.S.

- 426 EPA Contract EP-W-09-031. 1994.
- 427 31. Pavlovik D, Nikolic B, Durovic S, Waisi H, Andelikovic A MD. Chlorophyll as a measure  
428 of Plant Health: Agro-ecological Aspects. *Pestic Phytochemistry*. 2014;29(1):21-34.
- 429 32. Hiscox J, Israelstam G. A method for the extraction of chlorophyll from leaf tissue  
430 without maceration. *Can J Bot*. 1979;57(3):1332–4.
- 431 33. Arnon D. Copper enzymes in isolated chloroplasts. *Plant Physiol* [Internet]. 1949;24(1):1–  
432 15. Available from:  
433 [http://scholar.google.com/scholar?hl=en&btnG=Search&q=intitle:Copper+Enzymes+in+i](http://scholar.google.com/scholar?hl=en&btnG=Search&q=intitle:Copper+Enzymes+in+isolated+chloroplasts.#2%5Cnhttp://scholar.google.com/scholar?hl=en&btnG=Search&q=intitle:Copper+enzymes+in+isolated+chloroplasts.#2)  
434 [solated+chloroplasts.#2%5Cnhttp://scholar.google.com/scholar?hl=en&btnG=Search&q=i](http://scholar.google.com/scholar?hl=en&btnG=Search&q=intitle:Copper+enzymes+in+isolated+chloroplasts.#2)  
435 [ntitle:Copper+enzymes+in+isolated+chloroplasts.#2](http://scholar.google.com/scholar?hl=en&btnG=Search&q=intitle:Copper+enzymes+in+isolated+chloroplasts.#2)
- 436 34. Makoi JHJR, Bambara S, Ndakidemi PA, Box PO, Town C, Africa S. Rhizosphere  
437 phosphatase enzyme activities and secondary metabolites in plants as affected by the  
438 supply of Rhizobium , lime and molybdenum in *Phaseolus vulgaris* L . *Aust J Crop Sci*.  
439 2010;4(8):590–7.
- 440 35. Browgram R. Effects of Intensity of Defoliation on Regrowth of I . Introduction. *Aust J*  
441 *Agric Res*. 1956;7:377–387.
- 442 36. Falster DS, Westoby M. Plant height and evolutionary games. *TRENDS Ecol Evol*.  
443 2003;18(7):337–43.
- 444 37. Xu L, Freitas SMA, Yu F, Dong M, Anten NPR, Werger MJA. Effects of Trampling on  
445 Morphological and Mechanical Traits of Dryland Shrub Species Do Not Depend on Water

- 446 Availability. PLoS One. 2013;8(1):1–8.
- 447 38. Dekker J. Soil Weed Seed Banks and Weed Management. J Crop Prod. 2011;2(1):139–66.
- 448 39. Buhler DD, Hartzler RG, Forcella F. Weed Seed Bank Dynamics: Implications to Weed  
449 Management. J Crop Prod. 1997;1(1):145–68.
- 450 40. Martina JP, Ende CN Von. Correlation of Soil Nutrient Characteristics and Reed  
451 Canarygrass ( *Phalaris Arundinacea* : Poaceae ) Abundance in Northern Illinois ( USA )  
452 Correlation of Soil Nutrient Characteristics and Reed Canarygrass ( *Phalaris arundinacea* :  
453 Poaceae ) Abundance in. Am Midl Nat. 2008;160(2):430–7.
- 454 41. Marais A, Hardy M, Booyse M, Botha A. Effects of Monoculture , Crop Rotation , and  
455 Soil Moisture Content on Selected Soil Physicochemical and Microbial Parameters in  
456 Wheat Fields. Appl Environ Soil Sci. 2012;2012:13.
- 457 42. Zhang F, Li L. Using competitive and facilitative interactions in intercropping systems  
458 enhances crop productivity and nutrient-use efficiency Using competitive and facilitative  
459 interactions in intercropping systems enhances crop productivity and nutrient-use  
460 efficiency. Plant Soil. 2003;248(1/2):305–12.
- 461 43. Wang Z, Jin X, Bao X, Li X, Zhao J. Intercropping Enhances Productivity and Maintains  
462 the Most Soil Fertility Properties Relative to Sole Cropping. PLoS One. 2014;9(12):1–24.
- 463 44. Zhao D, Reddy KR, Gopal V, Reddy VR. Nitrogen deficiency effects on plant growth ,  
464 leaf photosynthesis , and hyperspectral reflectance properties of sorghum. Eur J Agron.  
465 2005;22:391–403.



- 466 45. Boussadia O, Steppe K, Zgallai H, Ben El Hadj S, Braham M, Lemeur R, et al. Effects of  
467 nitrogen deficiency on leaf photosynthesis, carbohydrate status and biomass production in  
468 two olive cultivars “Meski” and “Koroneiki.” *Sci Hortic (Amsterdam)*. 2010;123(3):336–  
469 42.
- 470 46. Saifuddin M, Hossain A NO. Impacts of Shading on Flower formation and Longevity,  
471 Leaf chlorophyll and Growth of *Bougainvillea glabra*. *Asian J Plant Sci*. 2010;9:20–7.
- 472 47. Cannell MGR. Environmental impacts of forest monocultures: water use, acidification,  
473 wildlife conservation, and carbon storage. *New For*. 1999;17:239–62.
- 474 48. Neill S. The functional Role of Anthocyanins in Leaves. In: Unpublished Thesis for the  
475 Doctoral award at The University of Auckland. 2002.
- 476 49. Chalker-Scott L. Environmental significance of anthocyanins in plant stress responses.  
477 *Photochem Photobiol*. 1999;70(1):1–9.
- 478 50. Mahmoodzadeh, H. ; Mahmoodzadeh M. Allelopathic effects of *Cynodon dactylon* L. on  
479 germination and growth of *Triticum aestivum*. *Ann Biol Res*. 2013;5(1):118-123.
- 480 51. Emerson BR. The relation between maximum rate of photo- synthesis and concentration  
481 of chlorophyll. *J Gen Physiol*. 1929;12:609.

482

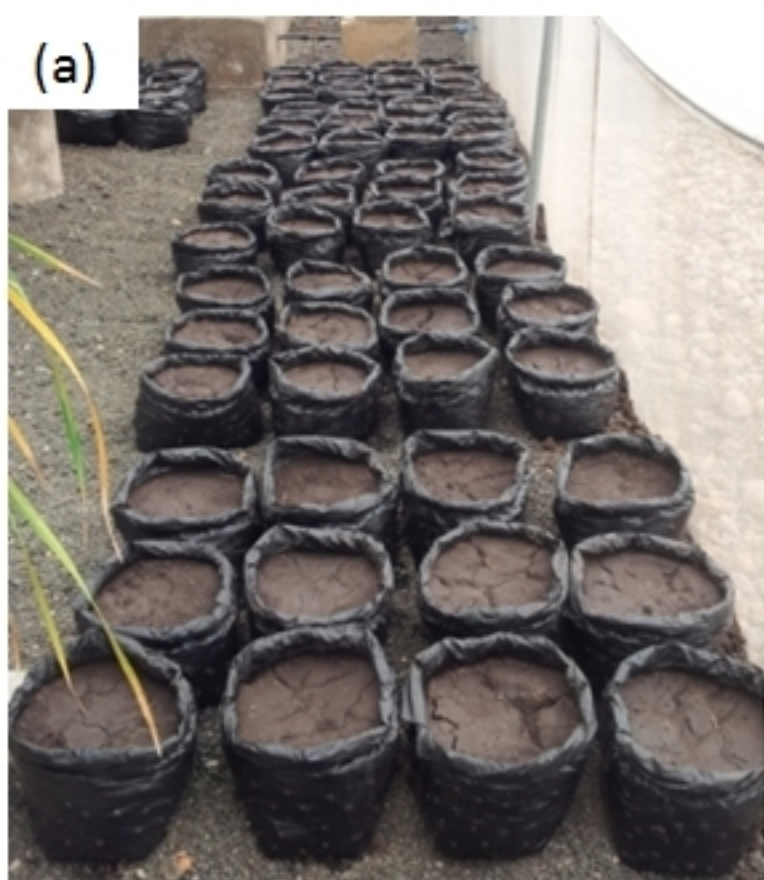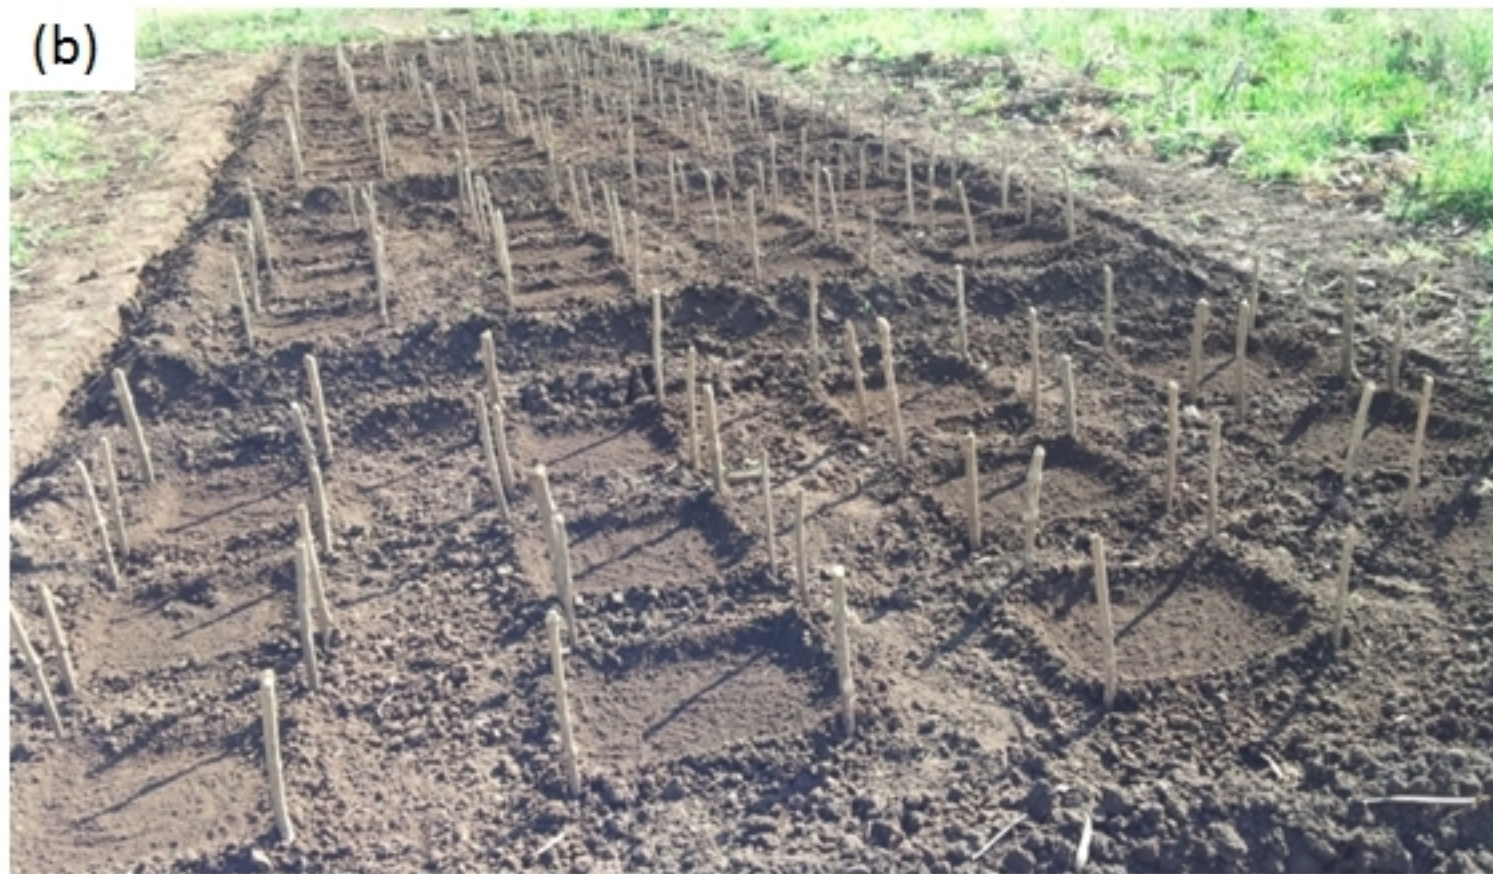

Fig 1

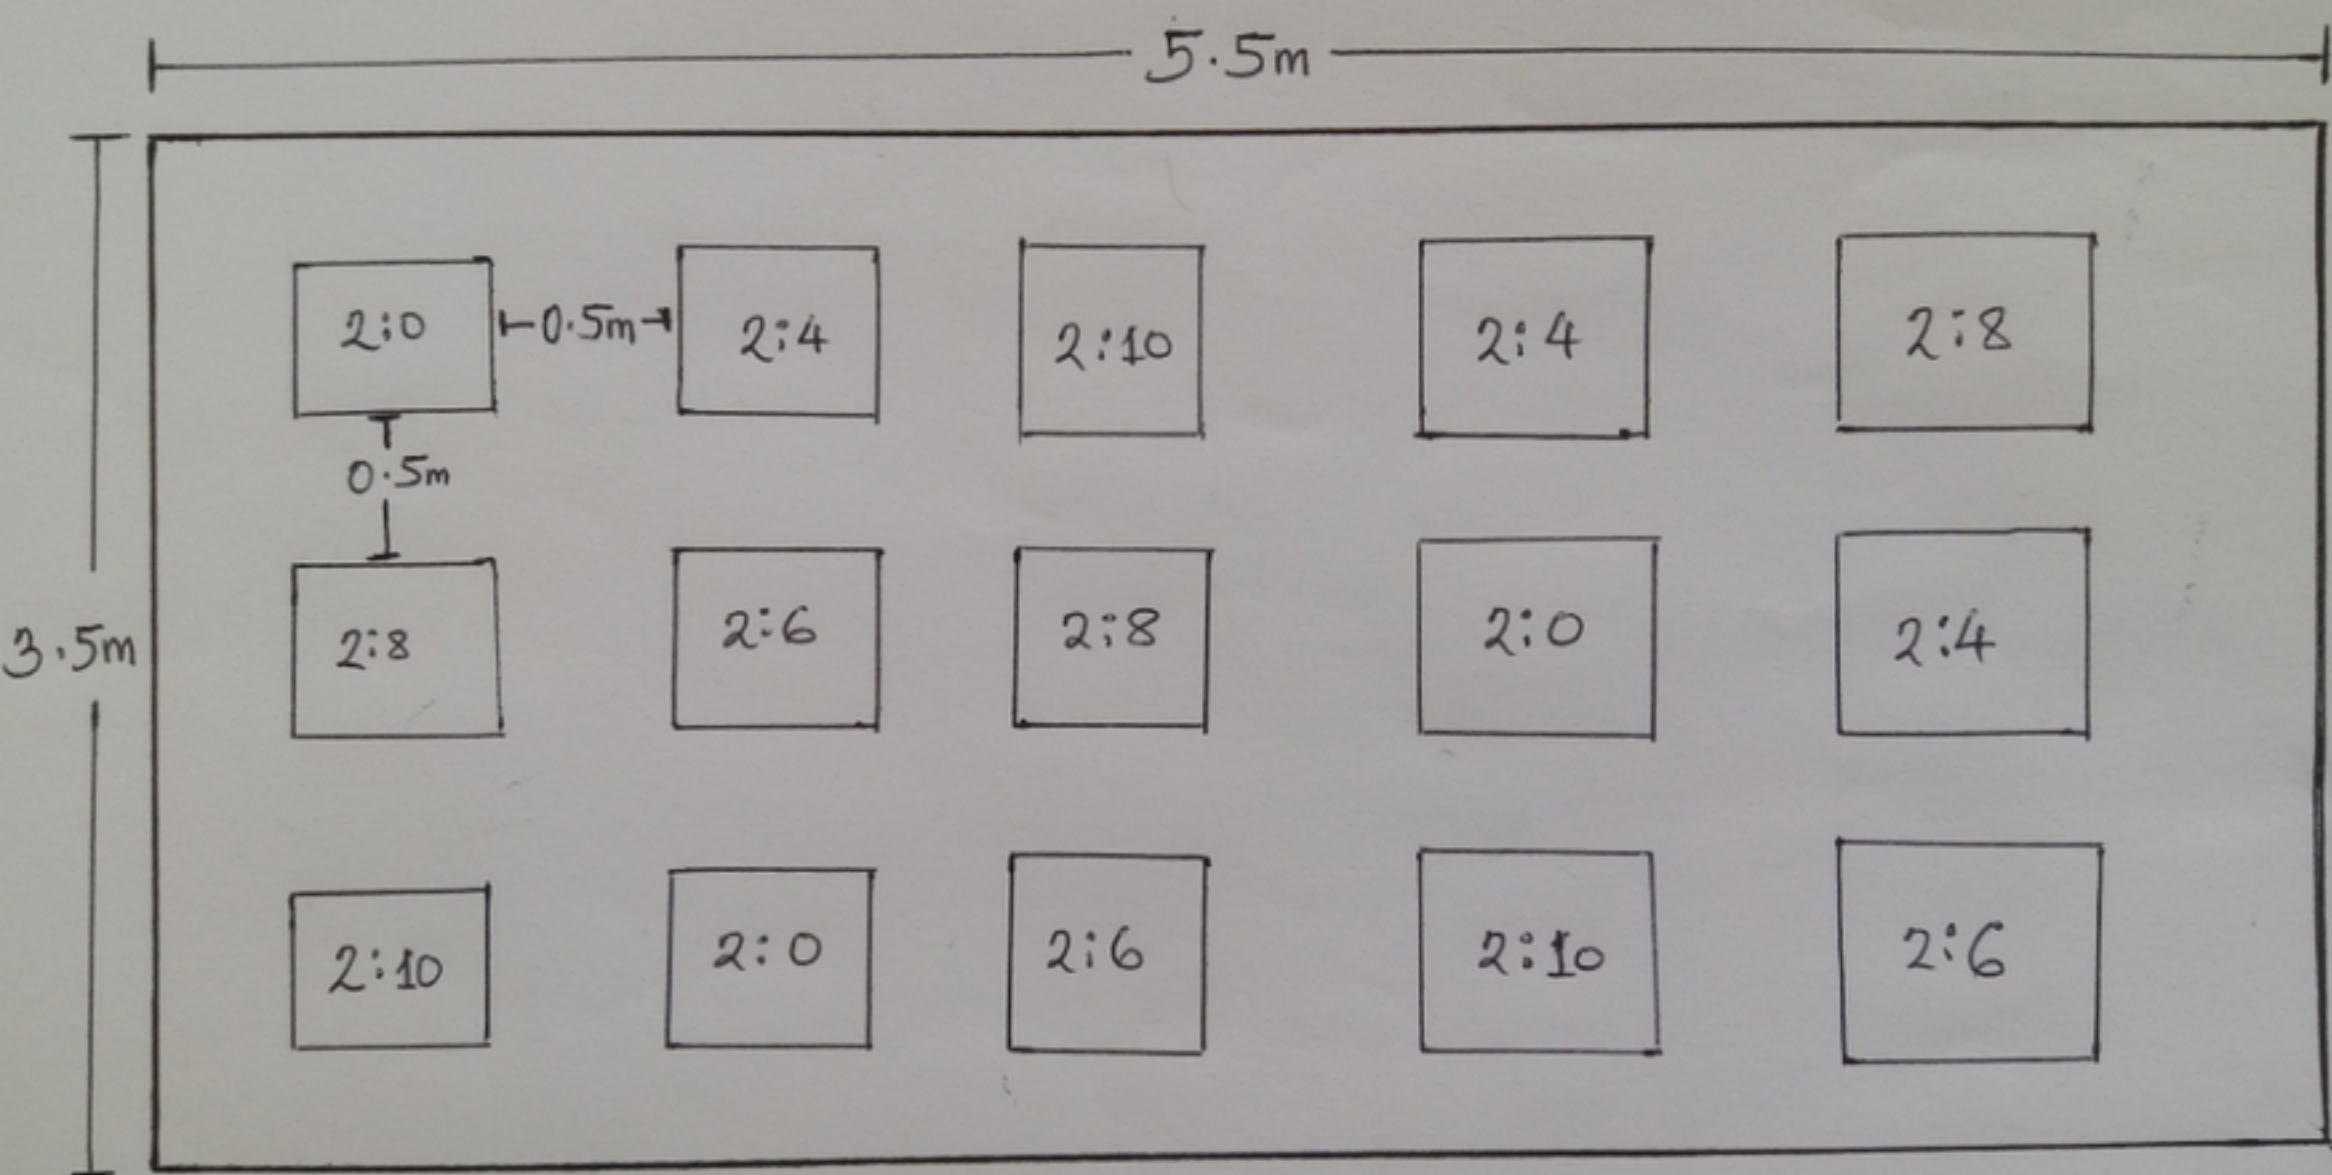

Fig 2

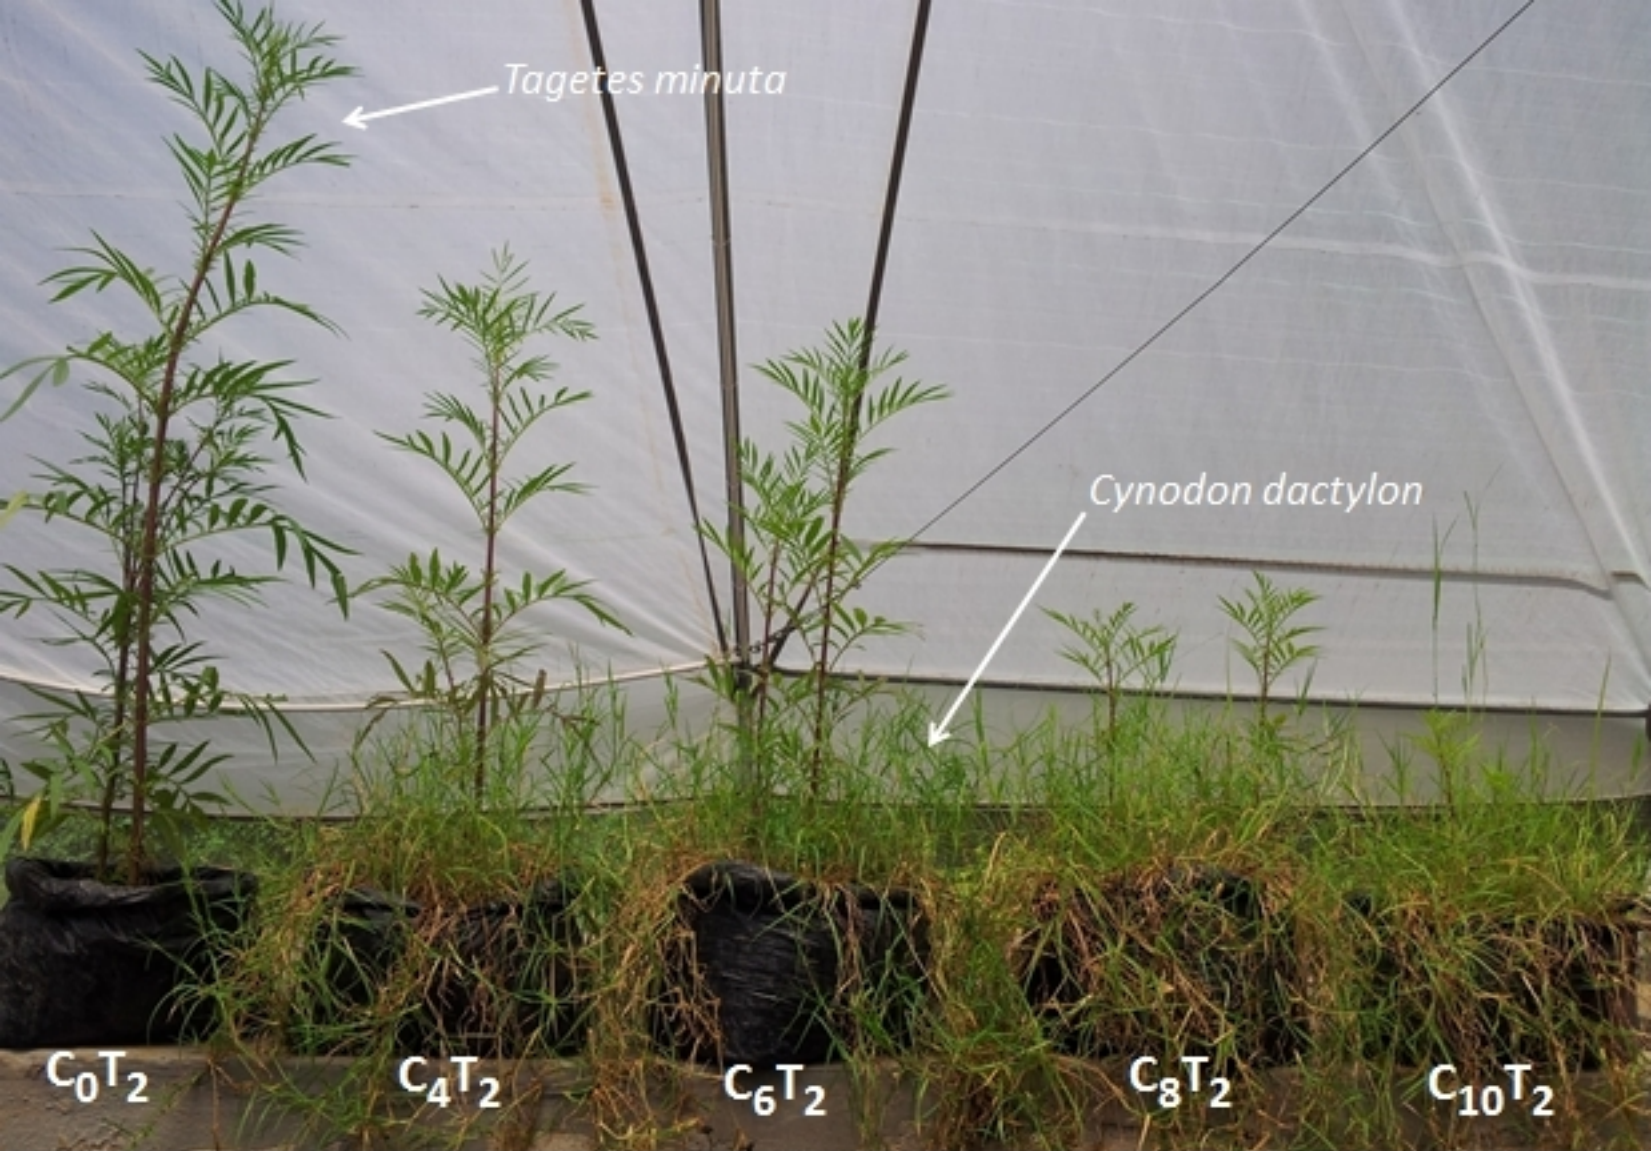

Fig 3

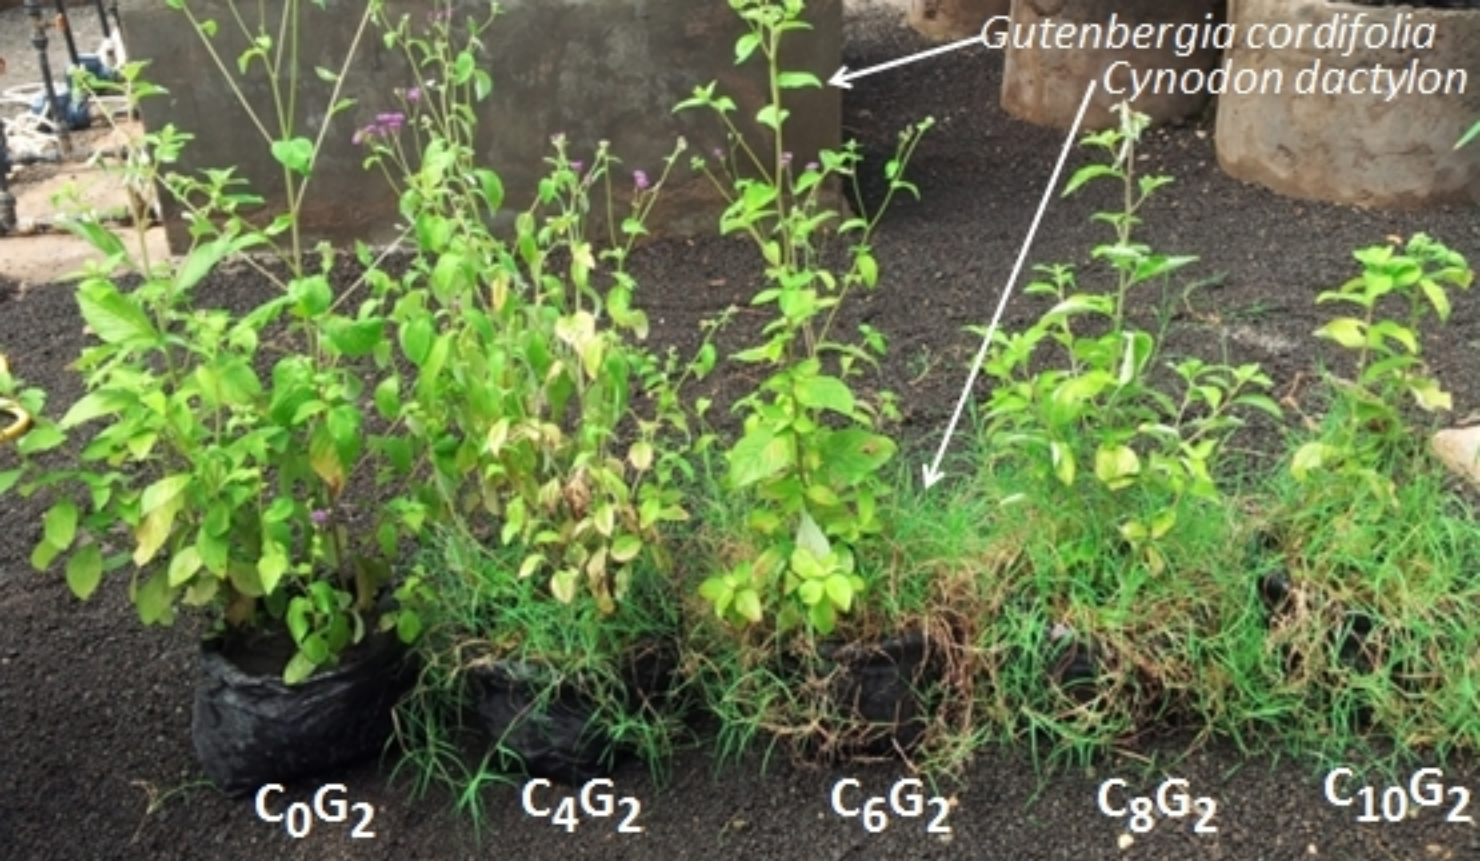

Fig 4

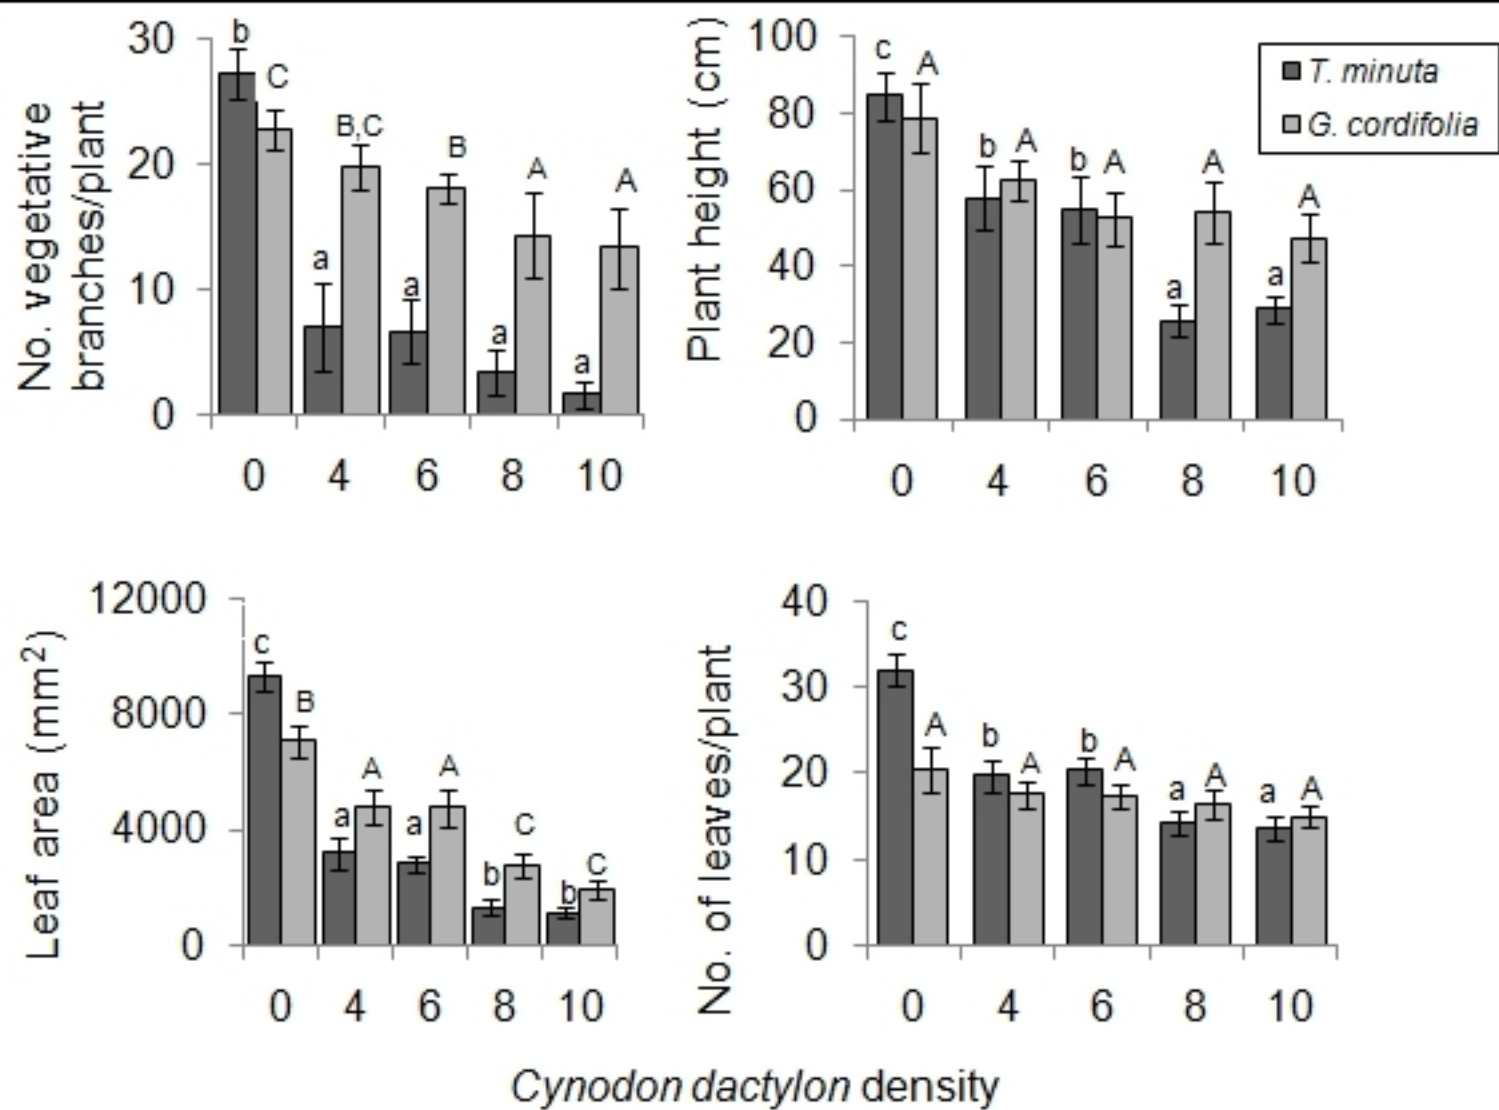

Fig 5

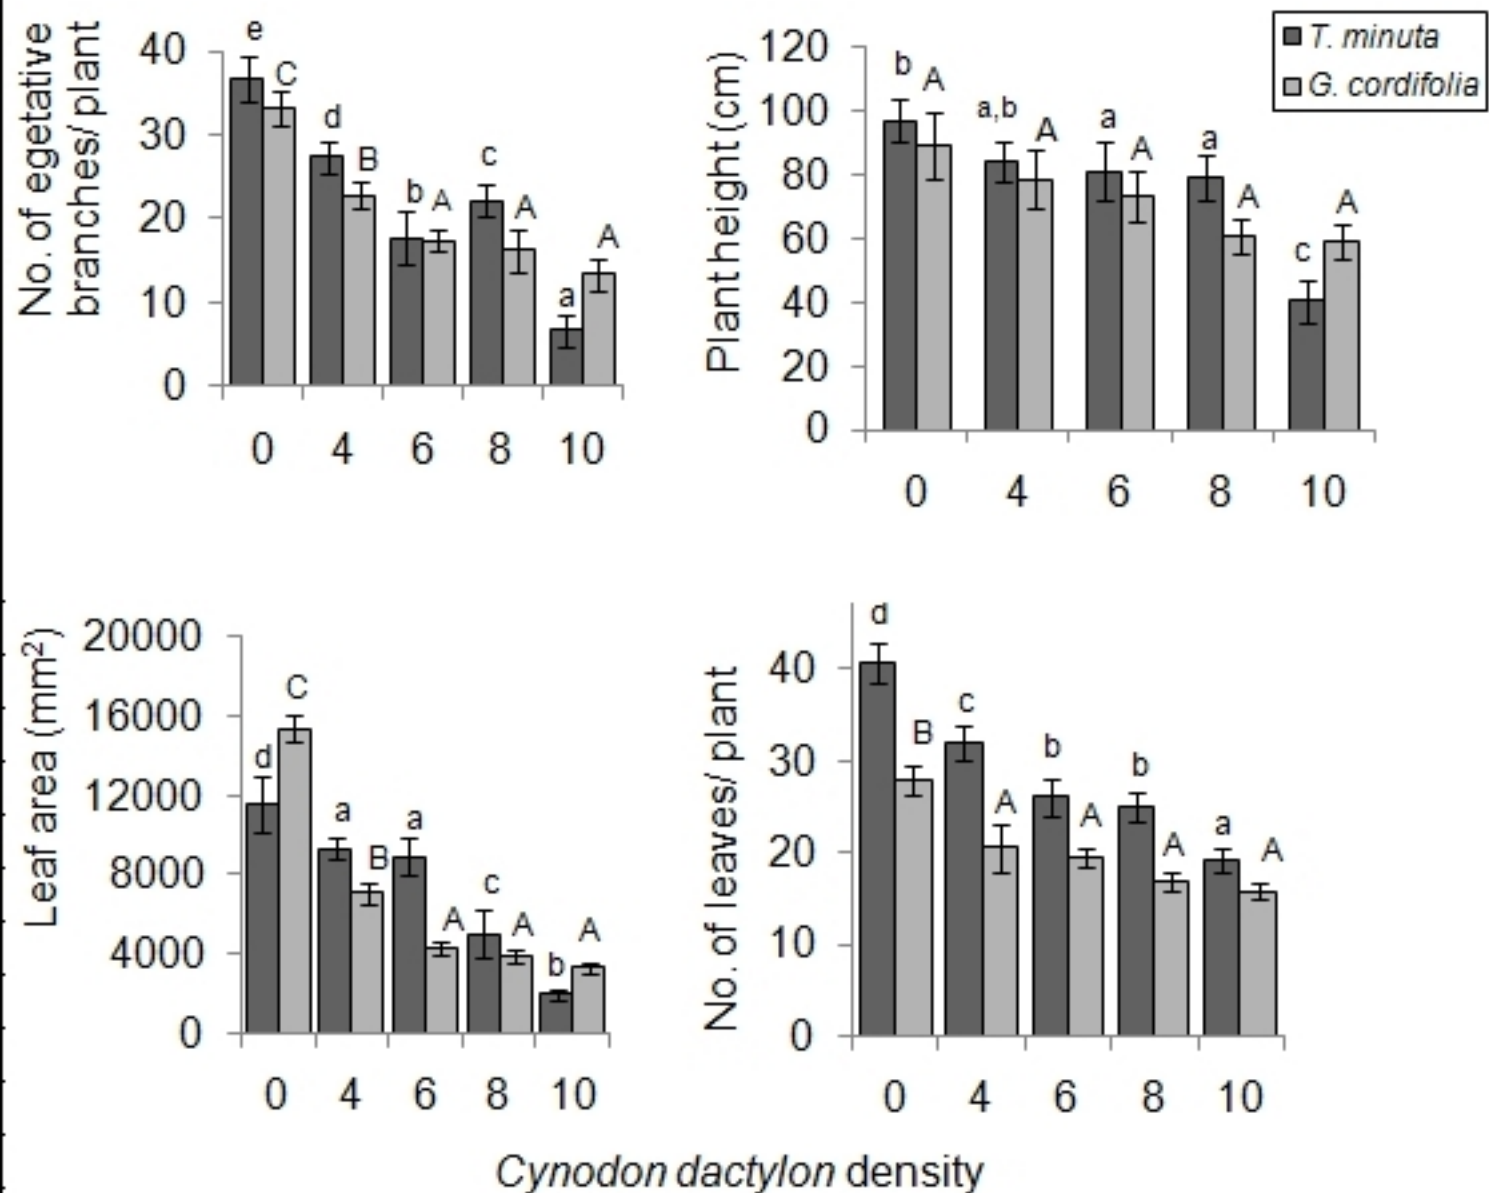

Fig 6

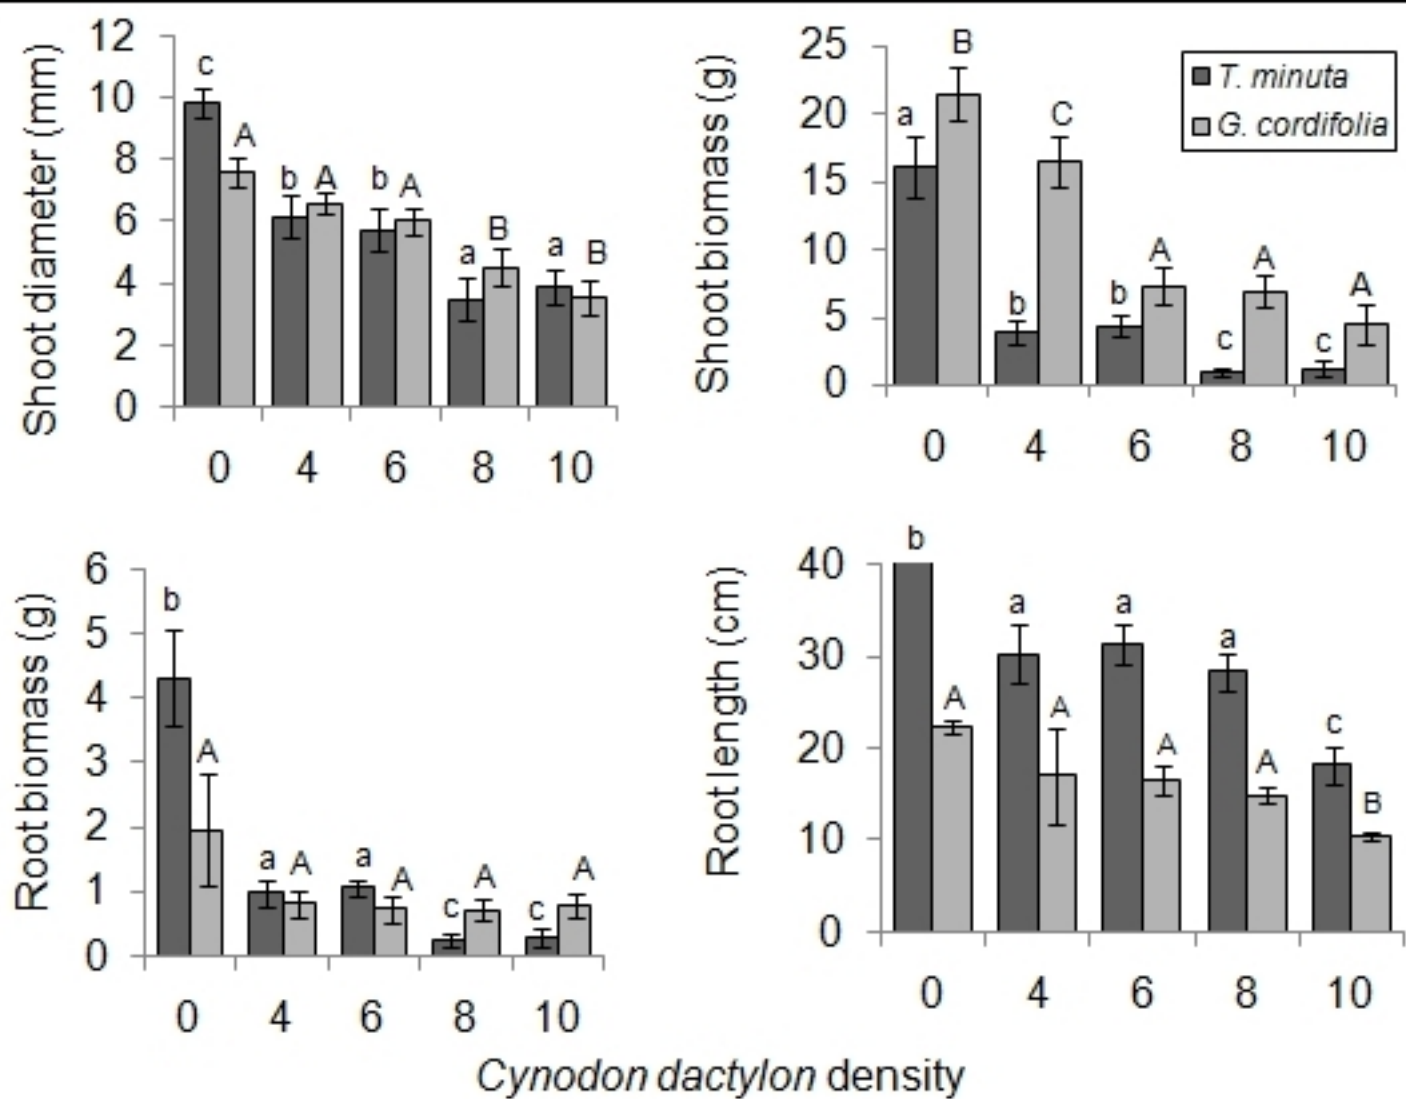

Fig 7



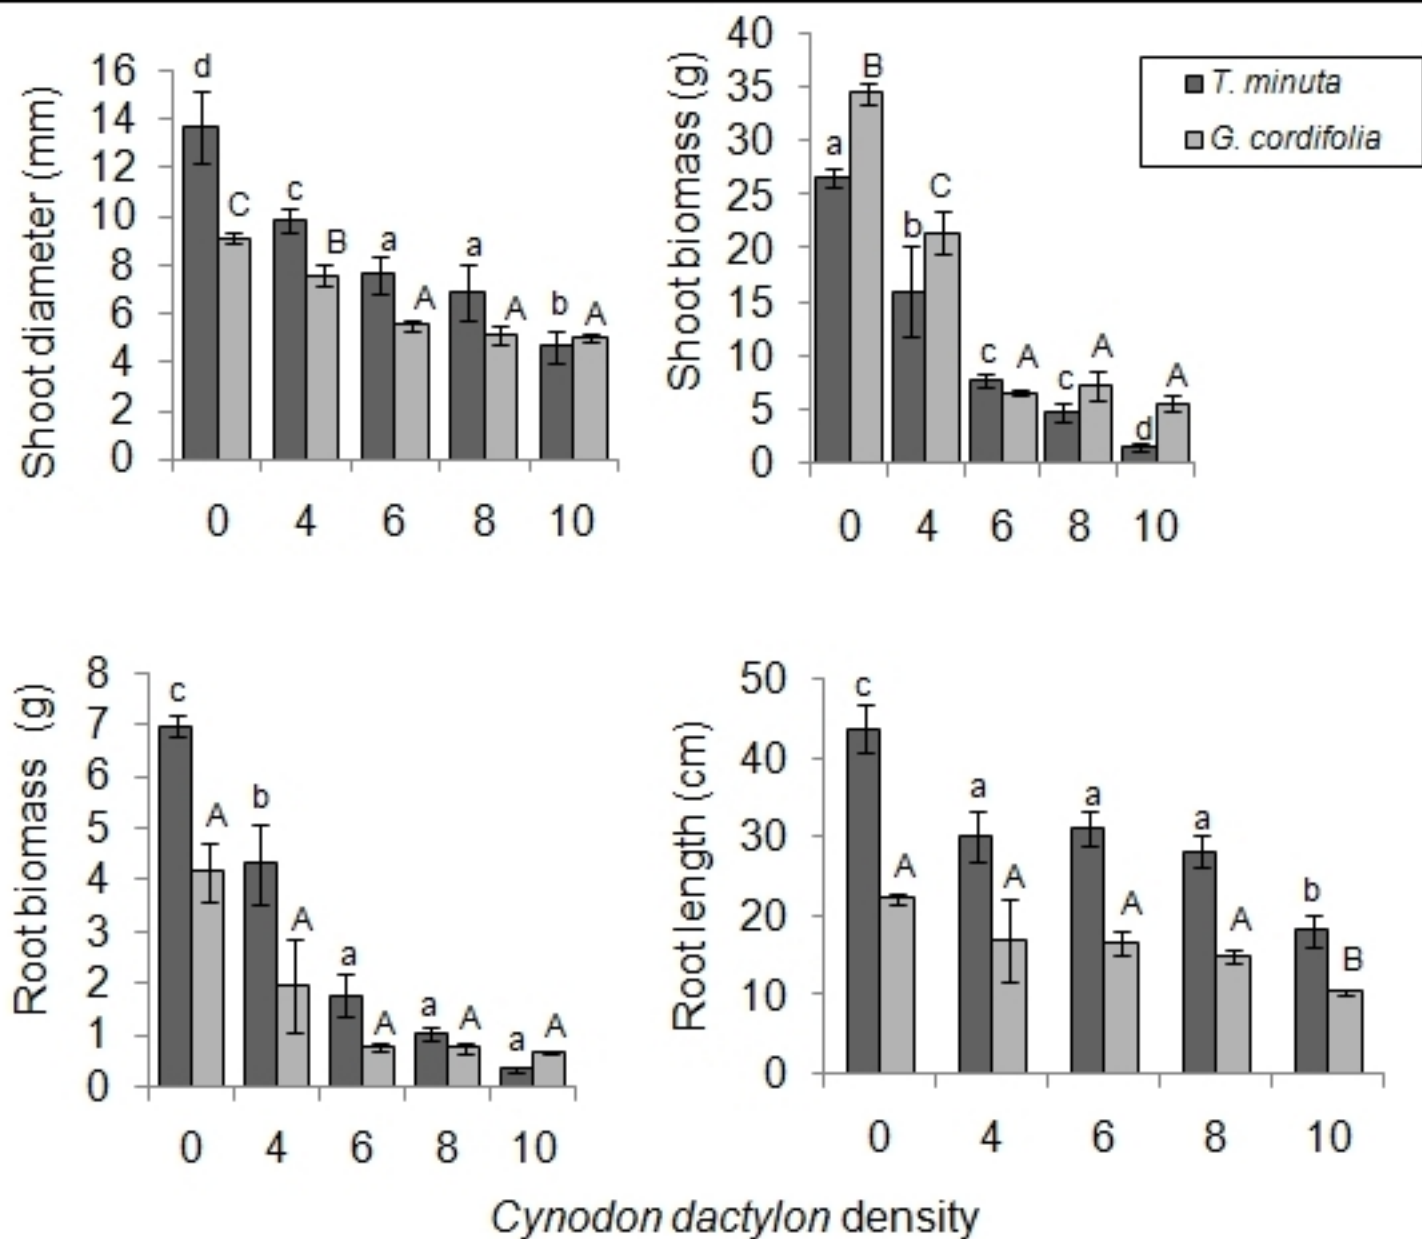

Fig 8

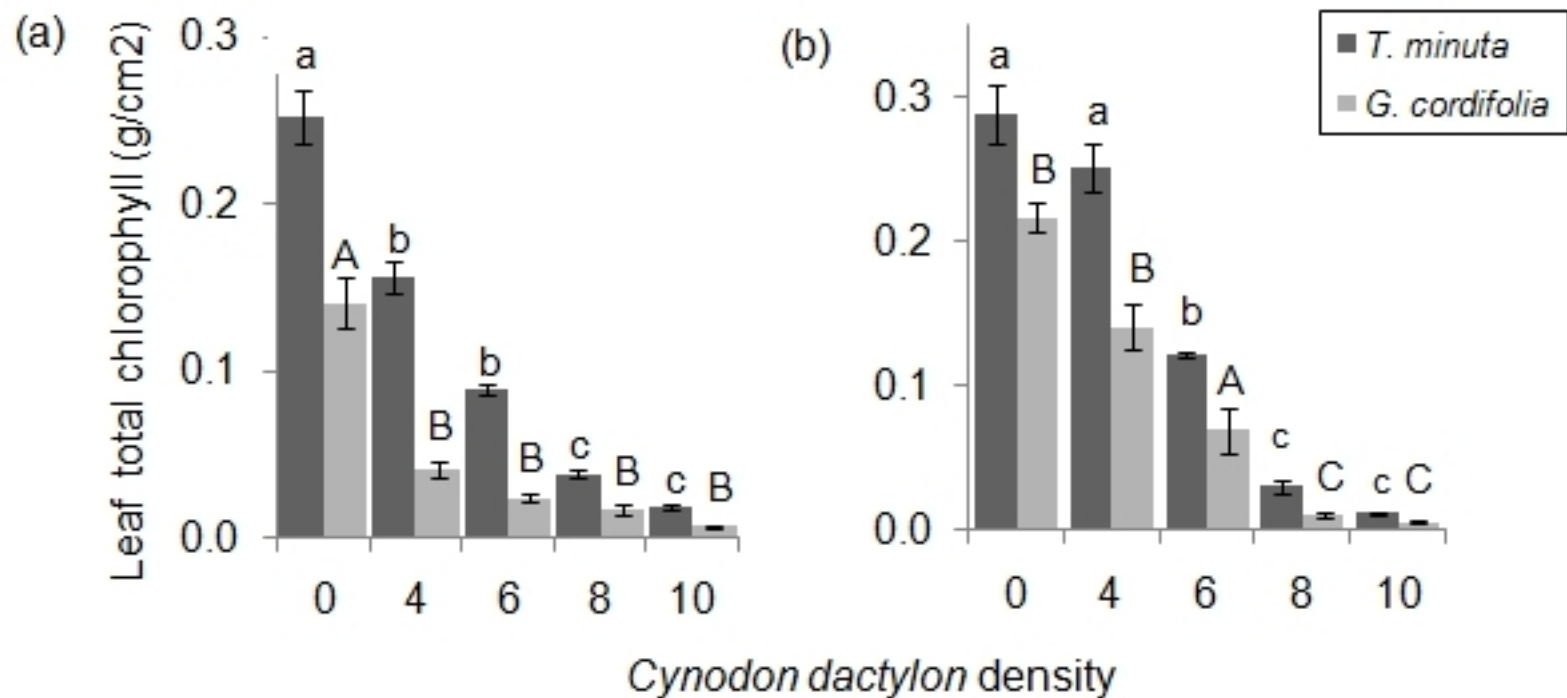

Fig 9

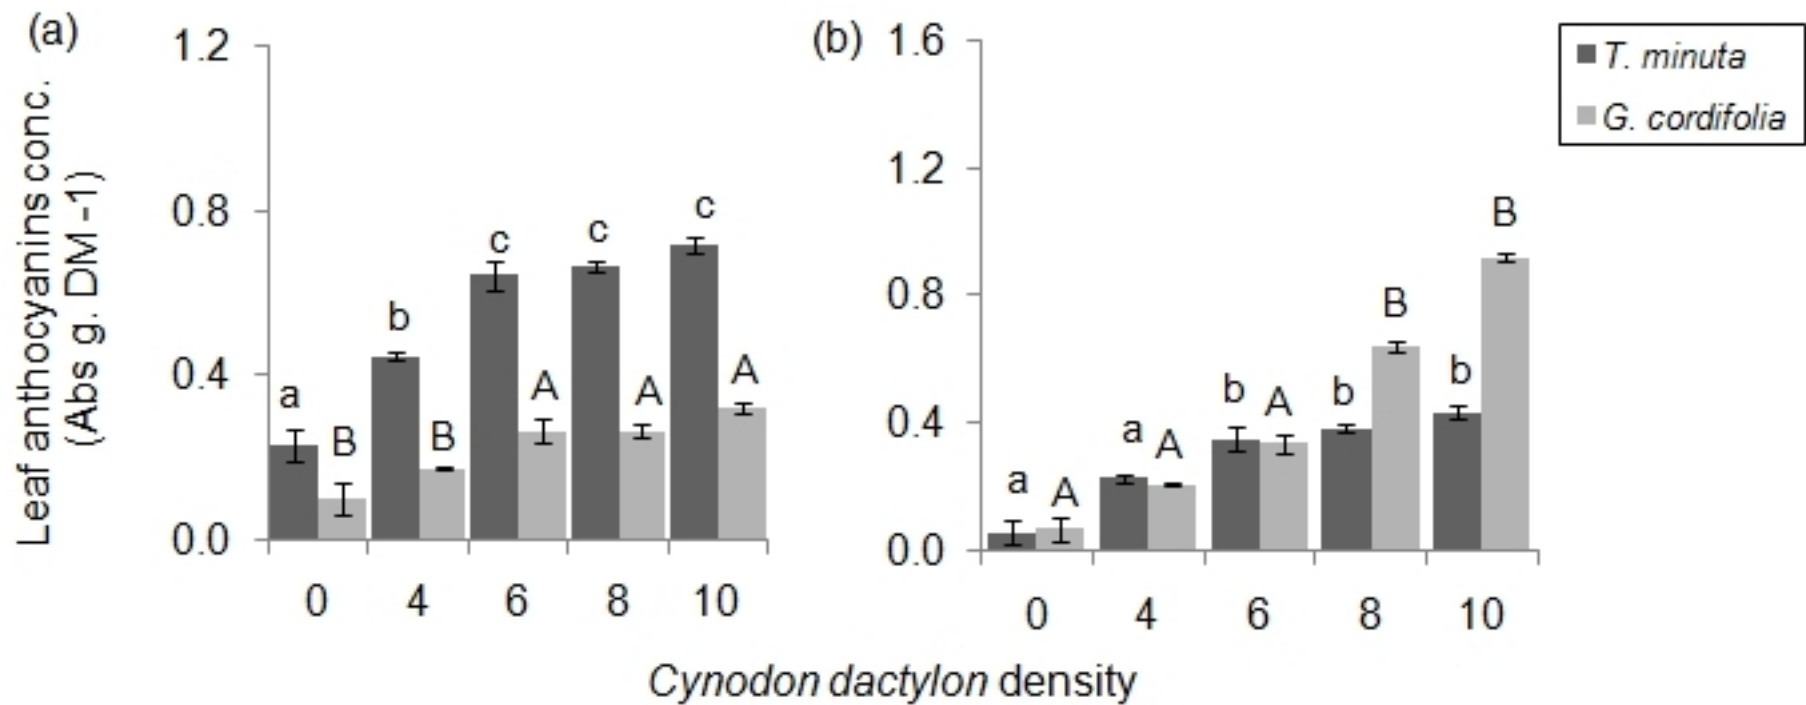

Fig 10
